# Supplementary material for: The Role of Plasminogen Activator Inhibitor 1 in Predicting Sepsis-Associated Liver Dysfunction: An Observational Study
Source: MDPI journal article supplement (doi:10.3390/ijerph20064846), 2023-03-09
Supplement: s1 [file s1]

## Supplementary Materials

### Correlation between PAI-1 and selected variables

Table 1supp shows the correlation between PAI-1 levels on day 1. of observation and bilirubin levels, SOFA score and lactate, procalcitonin, AST and ALP levels in the following days of observation in the whole study group.

**Table S1.** Correlation between PAI-1 levels on day 1. of observation, selected variables in the following days of observation in the whole study group.

| Day of observation | Marker               | Spearman correlation |       |        | Marker      | Spearman correlation |      |        | Marker         | Spearman correlation |      |        |
|--------------------|----------------------|----------------------|-------|--------|-------------|----------------------|------|--------|----------------|----------------------|------|--------|
|                    |                      | N                    | R     | P      |             | N                    | R    | P      |                | N                    | R    | P      |
| 1                  | <b>Bilirubin</b>     | 76                   | 0.26  | 0.02   | <b>SOFA</b> | 79                   | 0.26 | 0.020  | <b>Lactate</b> | 79                   | 0.63 | <0.001 |
| 3                  | <b>Bilirubin</b>     | 69                   | 0.42  | <0.001 | <b>SOFA</b> | 70                   | 0.37 | 0.0021 | <b>Lactate</b> | 70                   | 0.50 | <0.001 |
| 5                  | <b>Bilirubin</b>     | 53                   | 0.46  | 0.001  | <b>SOFA</b> | 55                   | 0.39 | 0.003  | <b>Lactate</b> | 55                   | 0.43 | 0.001  |
| 7                  | <b>Bilirubin</b>     | 48                   | 0.43  | 0.003  | <b>SOFA</b> | 51                   | 0.29 | 0.037  | <b>Lactate</b> | 51                   | 0.35 | 0.012  |
| 14                 | <b>Bilirubin</b>     | 19                   | 0.29  | 0.22   | <b>SOFA</b> | 21                   | 0.13 | 0.57   | <b>Lactate</b> | 21                   | 0.01 | 0.98   |
| 1                  | <b>Procalcitonin</b> | 78                   | 0.21  | 0.07   | AST         | 74                   | 0.42 | <0.001 | <b>ALP</b>     | 56                   | 0.16 | 0.252  |
| 3                  | <b>Procalcitonin</b> | 70                   | 0.46  | <0.001 | AST         | 62                   | 0.55 | <0.001 | <b>ALP</b>     | 17                   | 0.08 | 0.758  |
| 5                  | <b>Procalcitonin</b> | 54                   | 0.35  | 0.010  | AST         | 45                   | 0.57 | <0.001 | <b>ALP</b>     | 13                   | 0.12 | 0.707  |
| 7                  | <b>Procalcitonin</b> | 50                   | 0.30  | 0.035  | AST         | 45                   | 0.60 | <0.001 | <b>ALP</b>     | 13                   | 0.18 | 0.553  |
| 14                 | <b>Procalcitonin</b> | 21                   | -0.16 | 0.48   | AST         | 17                   | 0.64 | 0.006  | <b>ALP</b>     | 5                    | 0.90 | 0.037  |
